# Supplementary material
Source: PubMed Central journal article supplement (PMC1544074)

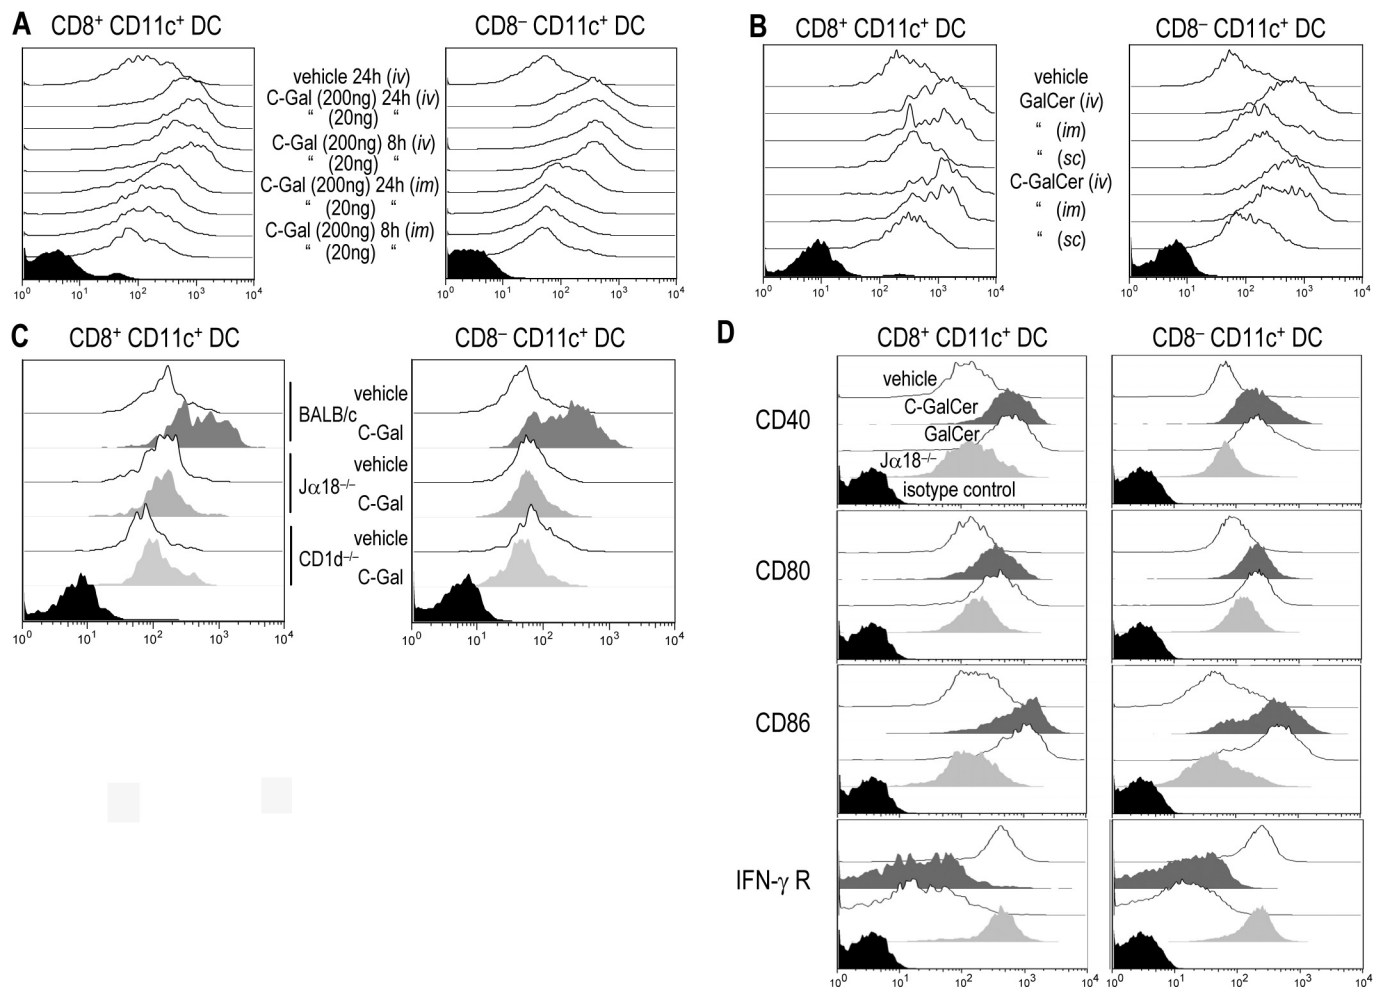

Supplement: pnas_0604812103_1.pdf [file pnas_0604812103_1.pdf]
